# Supplementary figures and images for: RPE65 mutation frequency and phenotypic variation according to exome sequencing in a tertiary centre for genetic eye diseases in China
Source: PubMed Central journal article supplement — Acta Ophthalmol. 2019 Jul 5;98(2):e181–90. doi: 10.1111/aos.14181 (PMC7079156; doi:10.1111/aos.14181), 2019-07-05

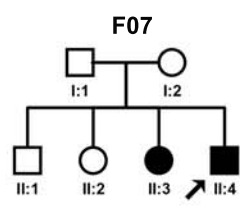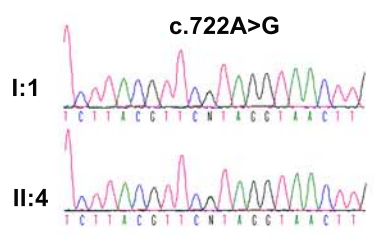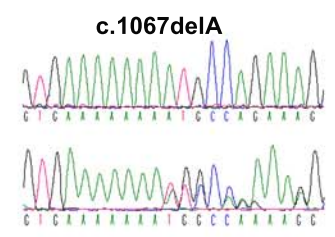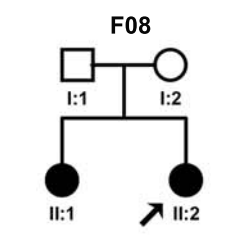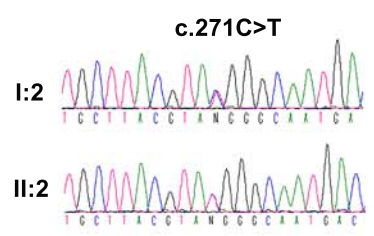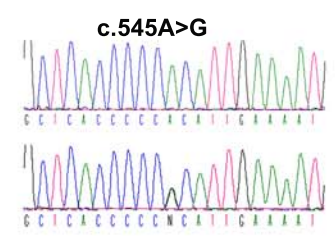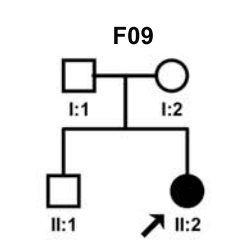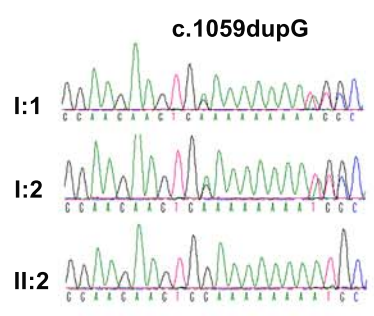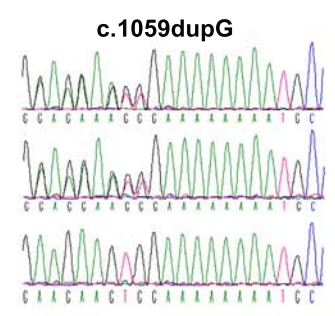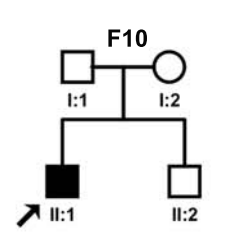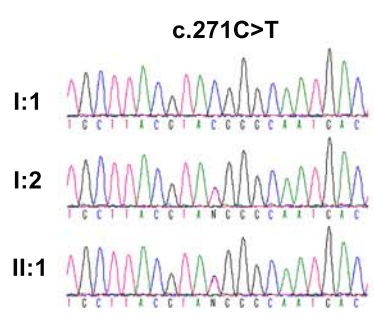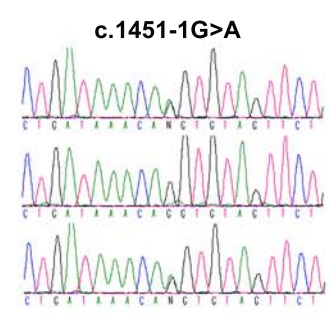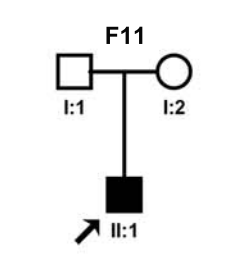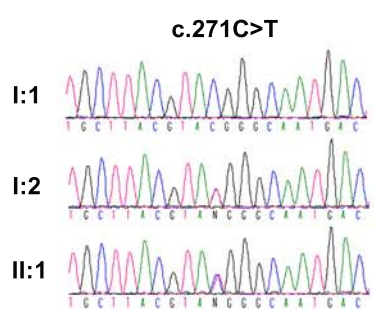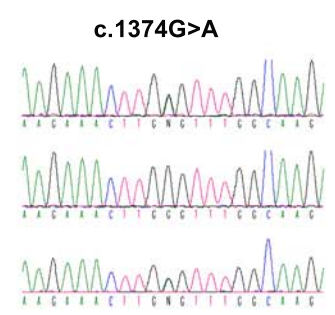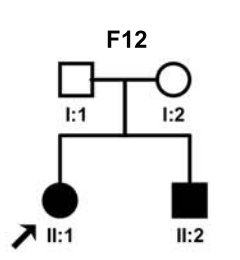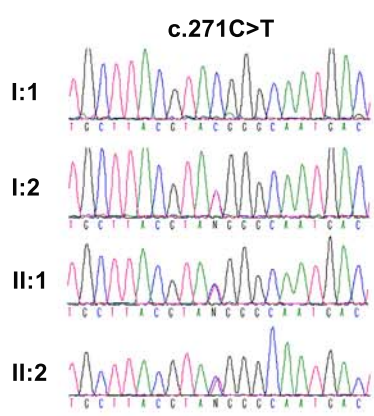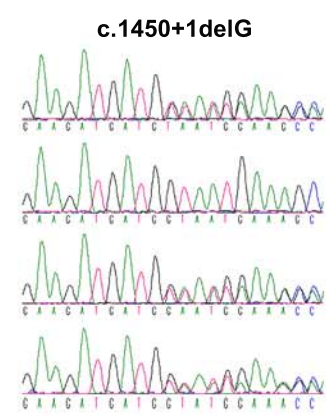



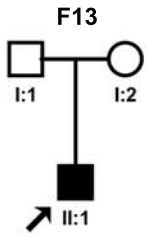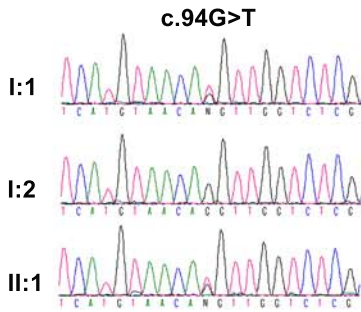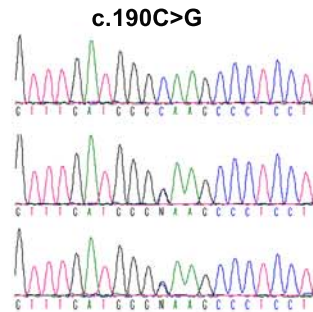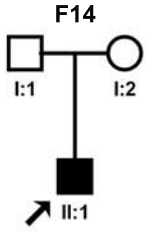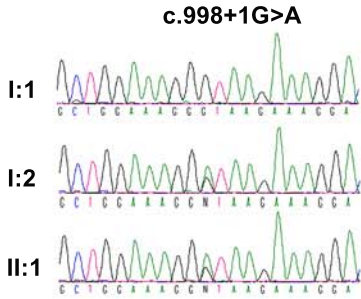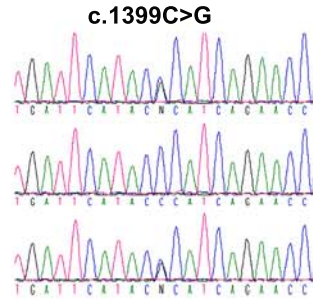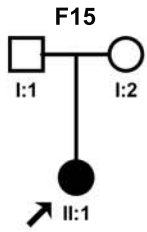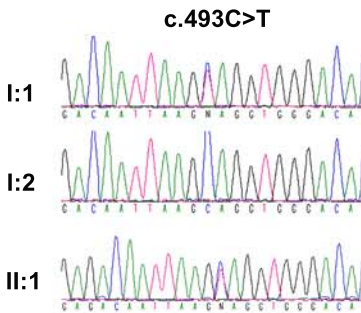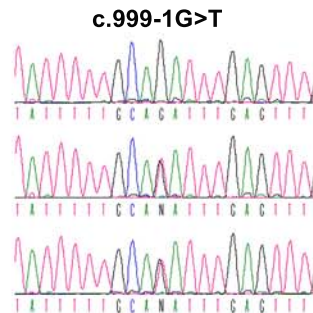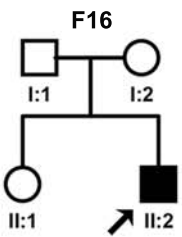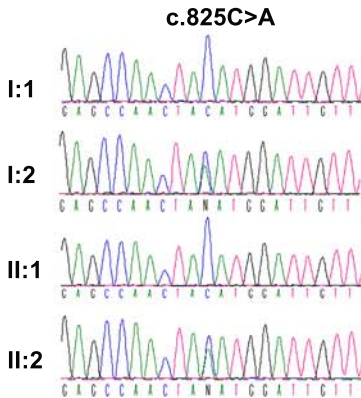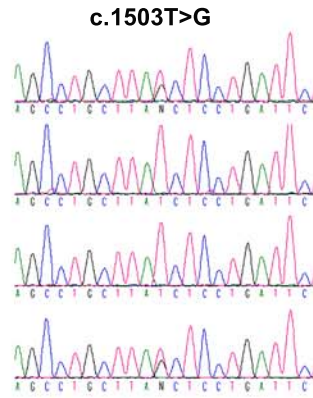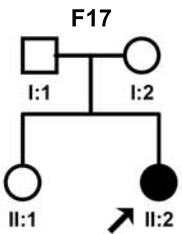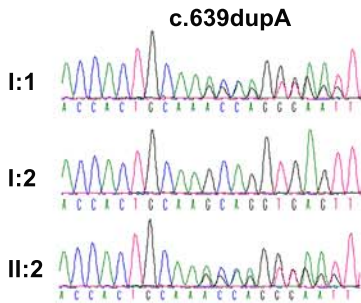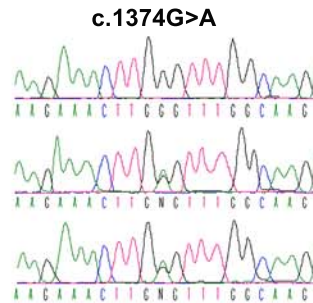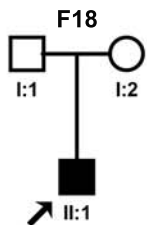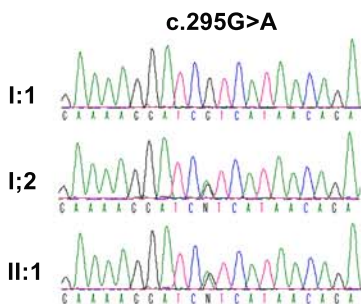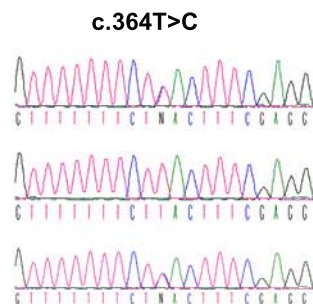

Supplement: AOS-98-e181-s001.pdf [file AOS-98-e181-s001.pdf]
